# Supplementary material for: Association Between Changes in Racial Residential and School Segregation and Trends in Racial Health Disparities, 2000–2020: A Life Course Perspective
Source: Springer Nature journal article supplement (doi:10.1007/s40615-024-01960-y), 2024-02-29
Supplement: MOESM1 [file 40615_2024_1960_MOESM1_ESM.pdf]

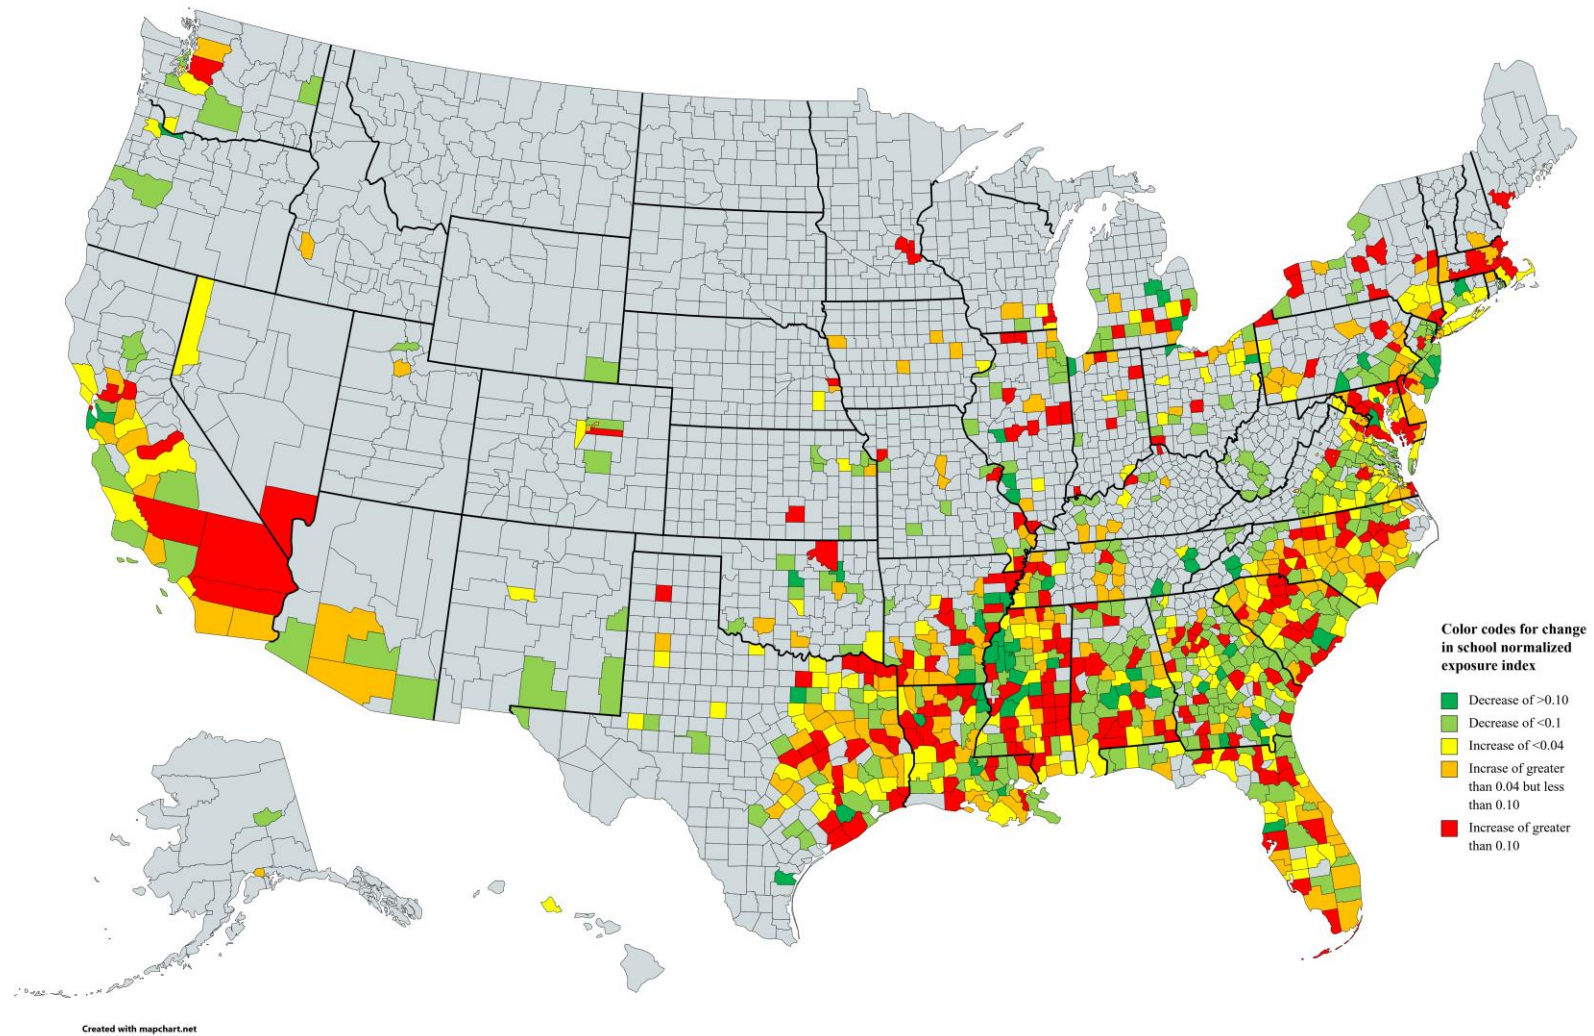

**Supplemental Fig. 1** Heat Map Showing Change in Racial School Segregation (Normalized Exposure Index) from 1991 to 2000

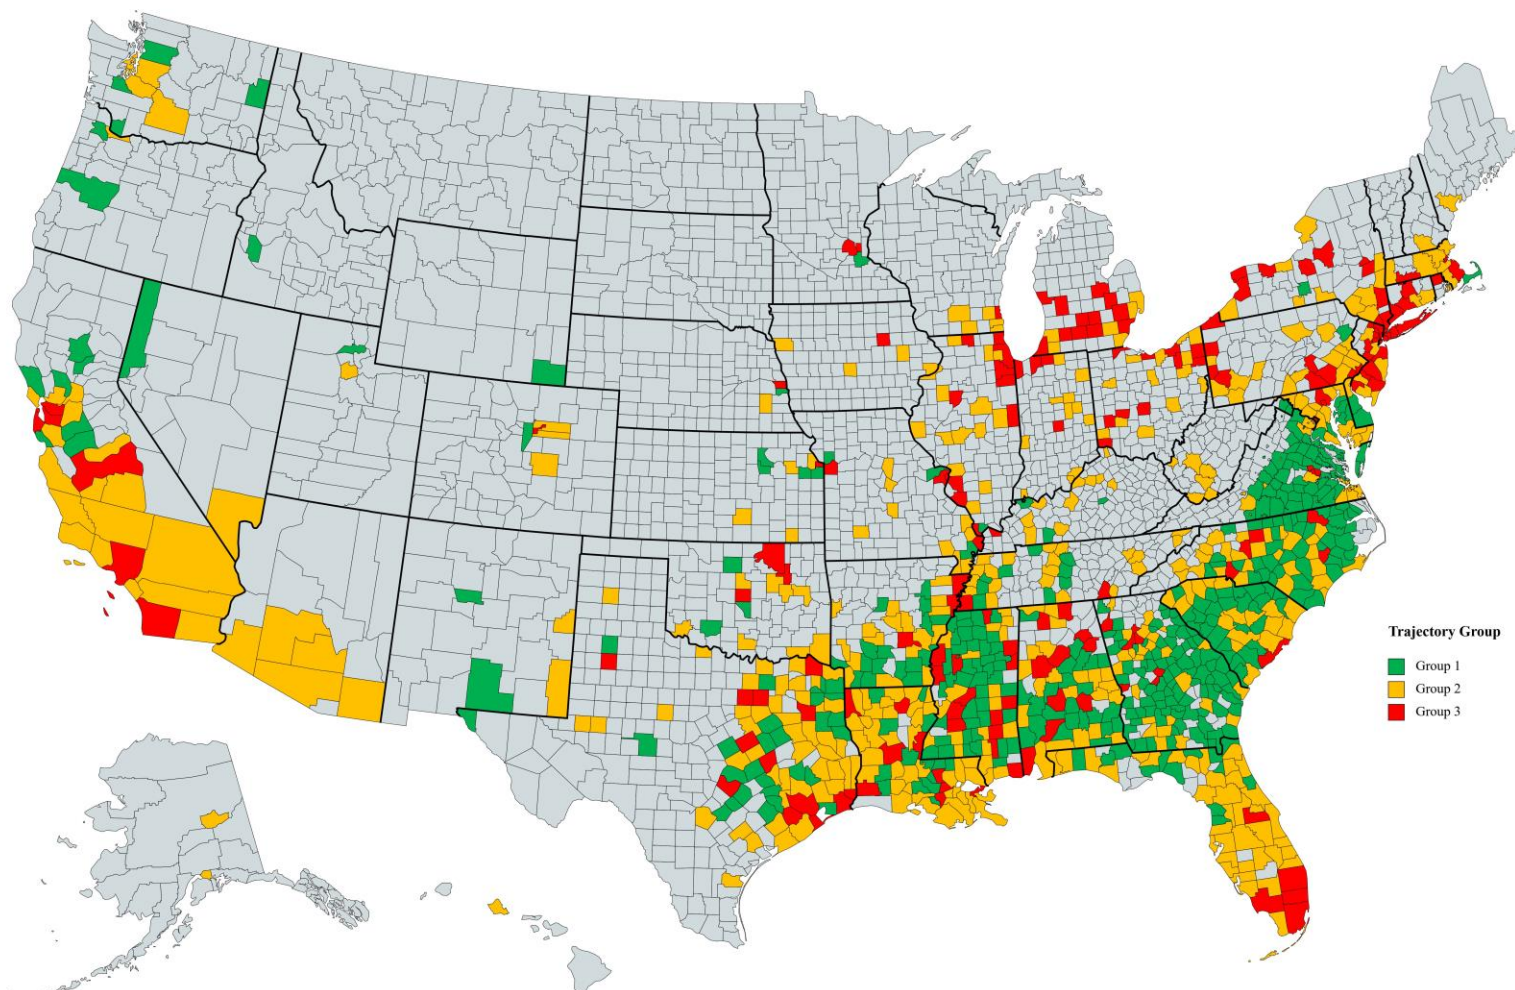

**Supplemental Fig. 2** Heat Map Showing Which Counties are in Which Residential/School Multi-Trajectory Group
